# Supplementary material
Source: publisher site journal article supplement (https://kjim.org/upload/media/kjim-2023-297-Supplementary-Table-2.pdf)
Supplement: Supplementary file 1 [file kjim-2023-297-Supplementary-Table-2.pdf]

**Supplementary Table 2. Baseline characteristics at initiation of b/tsDMARDs (3-year follow-up)**

| Variable                    | Total (n = 1,281) | ADA (n = 319)    | ETN (n = 358)    | IFX (n = 137)    | ABT (n = 115)    | TCZ (n = 246)    | TOF (n = 106)    | p value |
|-----------------------------|-------------------|------------------|------------------|------------------|------------------|------------------|------------------|---------|
| Age (yr)                    | 56.0 (45.0–63.0)  | 53.0 (43.0–61.0) | 57.0 (46.0–64.0) | 56.0 (49.0–62.0) | 60.0 (52.5–68.5) | 56.0 (44.0–63.0) | 56.0 (45.0–65.0) | < 0.001 |
| Sex, female                 | 1,100 (85.9)      | 271 (85.0)       | 304 (84.9)       | 120 (87.6)       | 106 (92.2)       | 206 (83.7)       | 93 (87.7)        | 0.325   |
| RA disease duration (yr)    | 8.0 (3.0–16.0)    | 7.0 (3.0–15.0)   | 9.0 (3.0–17.0)   | 8.0 (3.0–15.0)   | 10.0 (3.0–18.0)  | 7.0 (3.0–14.0)   | 11.0 (6.0–18.0)  | 0.022   |
| RF positivity               | 1,210 (94.5)      | 294 (92.2)       | 339 (94.7)       | 129 (94.2)       | 112 (97.4)       | 233 (94.7)       | 103 (97.2)       | 0.246   |
| Anti-CCP positivity         | 1,188 (92.7)      | 297 (93.1)       | 328 (91.6)       | 131 (95.6)       | 102 (88.7)       | 231 (93.9)       | 99 (93.4)        | 0.329   |
| CCI                         | 3.0 (2.0–4.0)     | 3.0 (2.0–4.0)    | 3.0 (2.0–4.0)    | 3.0 (2.0–4.0)    | 4.0 (3.0–5.0)    | 3.0 (2.0–4.0)    | 2.0 (1.0–3.0)    | < 0.001 |
| csDMARDs combination        | 1,201 (93.8)      | 307 (96.2)       | 331 (92.5)       | 136 (99.3)       | 110 (95.7)       | 227 (92.3)       | 90 (84.9)        | < 0.001 |
| MTX combination             | 1,122 (87.6)      | 301 (94.4)       | 316 (88.3)       | 135 (98.5)       | 81 (70.4)        | 206 (83.7)       | 83 (78.3)        | < 0.001 |
| Corticosteroid combination  | 1,119 (87.4)      | 280 (87.8)       | 316 (88.3)       | 120 (87.6)       | 92 (80.0)        | 220 (89.4)       | 91 (85.8)        | 0.211   |
| ESR (mm/h)                  | 47.0 (32.0–67.0)  | 51.0 (37.0–70.5) | 56.0 (40.0–77.0) | 44.0 (35.0–67.0) | 36.0 (21.5–54.5) | 45.5 (29.0–59.0) | 28.0 (15.0–45.0) | < 0.001 |
| CRP (mg/dL)                 | 1.3 (0.5–2.7)     | 1.3 (0.5–2.7)    | 1.6 (0.7–3.2)    | 1.3 (0.6–2.7)    | 0.6 (0.1–1.7)    | 1.2 (0.5–2.6)    | 1.0 (0.3–1.7)    | < 0.001 |
| Previous use of b/tsDMARDs  |                   |                  |                  |                  |                  |                  |                  | < 0.001 |
| 0                           | 824 (64.3)        | 248 (77.7)       | 241 (67.3)       | 111 (81.0)       | 71 (61.7)        | 116 (47.2)       | 37 (34.9)        |         |
| 1                           | 315 (24.6)        | 65 (20.4)        | 97 (27.1)        | 15 (10.9)        | 24 (20.9)        | 84 (34.1)        | 30 (28.3)        |         |
| ≥ 2                         | 142 (11.1)        | 6 (1.9)          | 20 (5.6)         | 11 (8.0)         | 20 (17.4)        | 46 (18.7)        | 39 (36.8)        |         |
| Starting year of b/tsDMARDs |                   |                  |                  |                  |                  |                  |                  | < 0.001 |
| 2008–2014                   | 847 (66.1)        | 268 (84.0)       | 324 (90.5)       | 104 (75.9)       | 41 (35.7)        | 110 (44.7)       | 0 (0.0)          |         |
| ≥ 2015                      | 434 (33.9)        | 51 (16.0)        | 34 (9.5)         | 33 (24.1)        | 74 (64.3)        | 136 (55.3)       | 106 (100.0)      |         |

Values are presented as median (interquartile range) or number (%).

b/tsDMARDs, biological or targeted synthetic disease-modifying anti-rheumatic drugs; ADA, adalimumab; ETN, etanercept; IFX, infliximab; ABT, abatacept; TCZ, tocilizumab; TOF, tofacitinib; RA, rheumatoid arthritis; RF, rheumatoid factor; CCP, cyclic citrullinated peptide; CCI, Charlson comorbidity index; csDMARDs, conventional synthetic disease-modifying anti-rheumatic drugs; MTX, methotrexate; ESR, erythrocyte sedimentation rate; CRP, C-reactive protein.
